# Supplementary material for: Food restriction increase the expression of mTORC1 complex genes in the skeletal muscle of juvenile pacu (Piaractus mesopotamicus)
Source: PubMed Central journal article supplement (PMC5432107; doi:10.1371/journal.pone.0177679), 2017-05-15

## Comparative analysis of miRNA targets

---

Version: RNAhybrid 2.2

searching  
dataset: 1  
mde of dre-miR-1: -38.299995  
Individual hits

---

dataset: 1  
**Target:** *utr3\_IGF1\_Piaractus\_mesopotamicus*  
length: 700  
**MiRNA:** *dre-miR-1*  
length: 22

mfe: -18.3 kcal/mol  
p-value: undefined

Position: 535  
target 5' G G G AG U 3'  
AUGCU UCU UGCA CCA  
UAUGA AGA AUGU GGU  
miRNA 3' UAUG A AA 5'

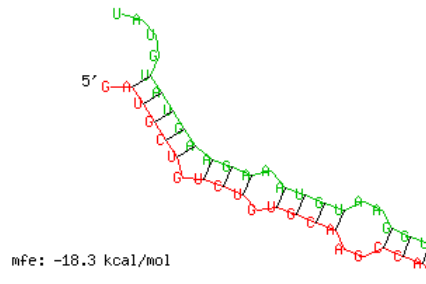

Version: RNAhybrid 2.2

searching  
dataset: 1  
mde of dre-miR-206-3p: -45.699997  
Individual hits

---

dataset: 1  
**Target:** *utr3\_IGF1\_Piaractus\_mesopotamicus*  
length: 700  
**MiRNA:** *dre-miR-206-3p*  
length: 22

mfe: -20.8 kcal/mol  
p-value: undefined

Position: 183  
target 5' U GCG A C G 3'  
UAUACAUU CC UU CAUUCU  
GUGUGUGA GG AA GUAAGG  
miRNA 3' G A U U 5'

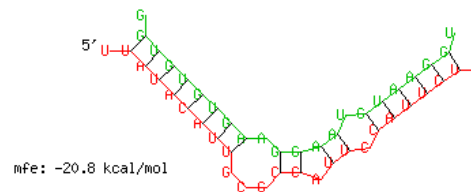

Version: RNAhybrid 2.2

searching  
dataset: 1  
mde of dre-miR-199-3p: -44.100002  
Individual hits

---

dataset: 1  
**Target:** *utr3\_IGF1\_Piaractus\_mesopotamicus*  
length: 700  
**MiRNA:** *dre-miR-199-3p*  
length: 22

mfe: -22.4 kcal/mol  
p-value: undefined

Position: 306  
target 5' U UCU AAGA G 3'  
AACU UGCAG GCUGCUG  
UUGG ACGUC UGAUGAC  
miRNA 3' UUAC AU 5'

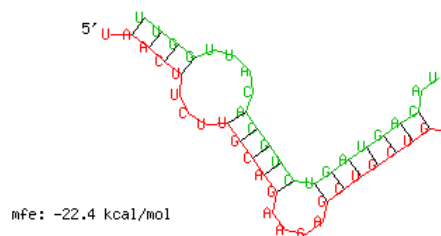

---

Version: RNAhybrid 2.2

searching  
dataset: 1  
mde of dre-miR-199-3p: -44.100002  
Individual hits

---

dataset: 1  
**Target:** *utr3\_mTOR\_Piaractus\_mesopotamicus*  
length: 1022  
**MiRNA:** *dre-miR-199-3p*  
length: 22

mfe: -25.8 kcal/mol  
p-value: undefined

**Position:** 902  
target 5' C UAGC C A G 3'  
ACCG UGUG CGGAC UGCUG  
UGGU ACAC GUCUG AUGAC  
miRNA 3' U U AU 5'

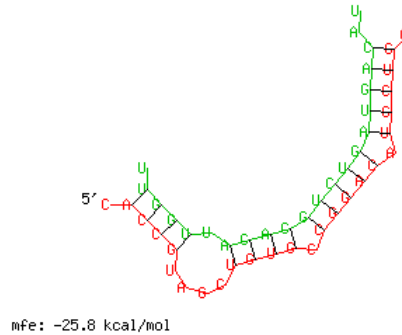

Version: RNAhybrid 2.2

searching  
dataset: 1  
mde of dre-miR-23a-3p: -46.299995  
Individual hits

---

dataset: 1  
**Target:** *utr3\_MAFBx\_Piaractus\_mesopotamicus*  
length: 537  
**MiRNA:** *dre-miR-23a-3p*  
length: 22

mfe: -23.1 kcal/mol  
p-value: undefined

**Position:** 197  
target 5' G CAUA A CUUUA A 3'  
UGGA AAUCC CUGGU UGA  
ACCU UUAGG GACCG ACU  
miRNA 3' UUAC A 5'

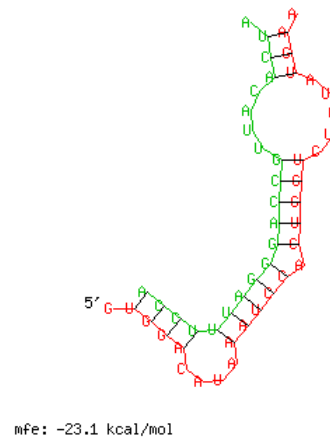

Version: RNAhybrid 2.2

searching  
dataset: 1  
mde of dre-miR-23a-3p: -46.299995  
Individual hits

---

dataset: 1  
**Target:** *utr3\_PGC1a\_Piaractus\_mesopotamicus*  
length: 202  
**MiRNA:** *dre-miR-23a-3p*  
length: 22

mfe: -14.9 kcal/mol  
p-value: undefined

**Position:** 149  
target 5' U U 3'  
UCCUCG  
AGGGAC  
miRNA 3' ACCUUU CGUUACACUA 5'

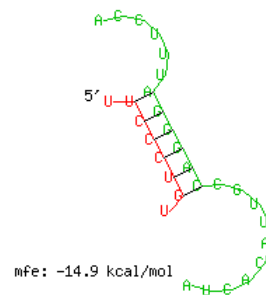

Supplement: pone.0177679.s002.pdf [file pone.0177679.s002.pdf]
